# Supplementary material
Source: PubMed Central journal article supplement (PMC6461408)
Supplement: NIHMS1526173-supplement-1.pdf [file NIHMS1526173-supplement-1.pdf]

**Cell Reports, Volume 27**

**Supplemental Information**

**Transcriptional Circuit Fragility**

**Influences HIV Proviral Fate**

**Emily L. Morton, Christian V. Forst, Yue Zheng, Ana B. DePaula-Silva, Nora-Guadalupe P. Ramirez, Vicente Planelles, and Iván D'Orso**

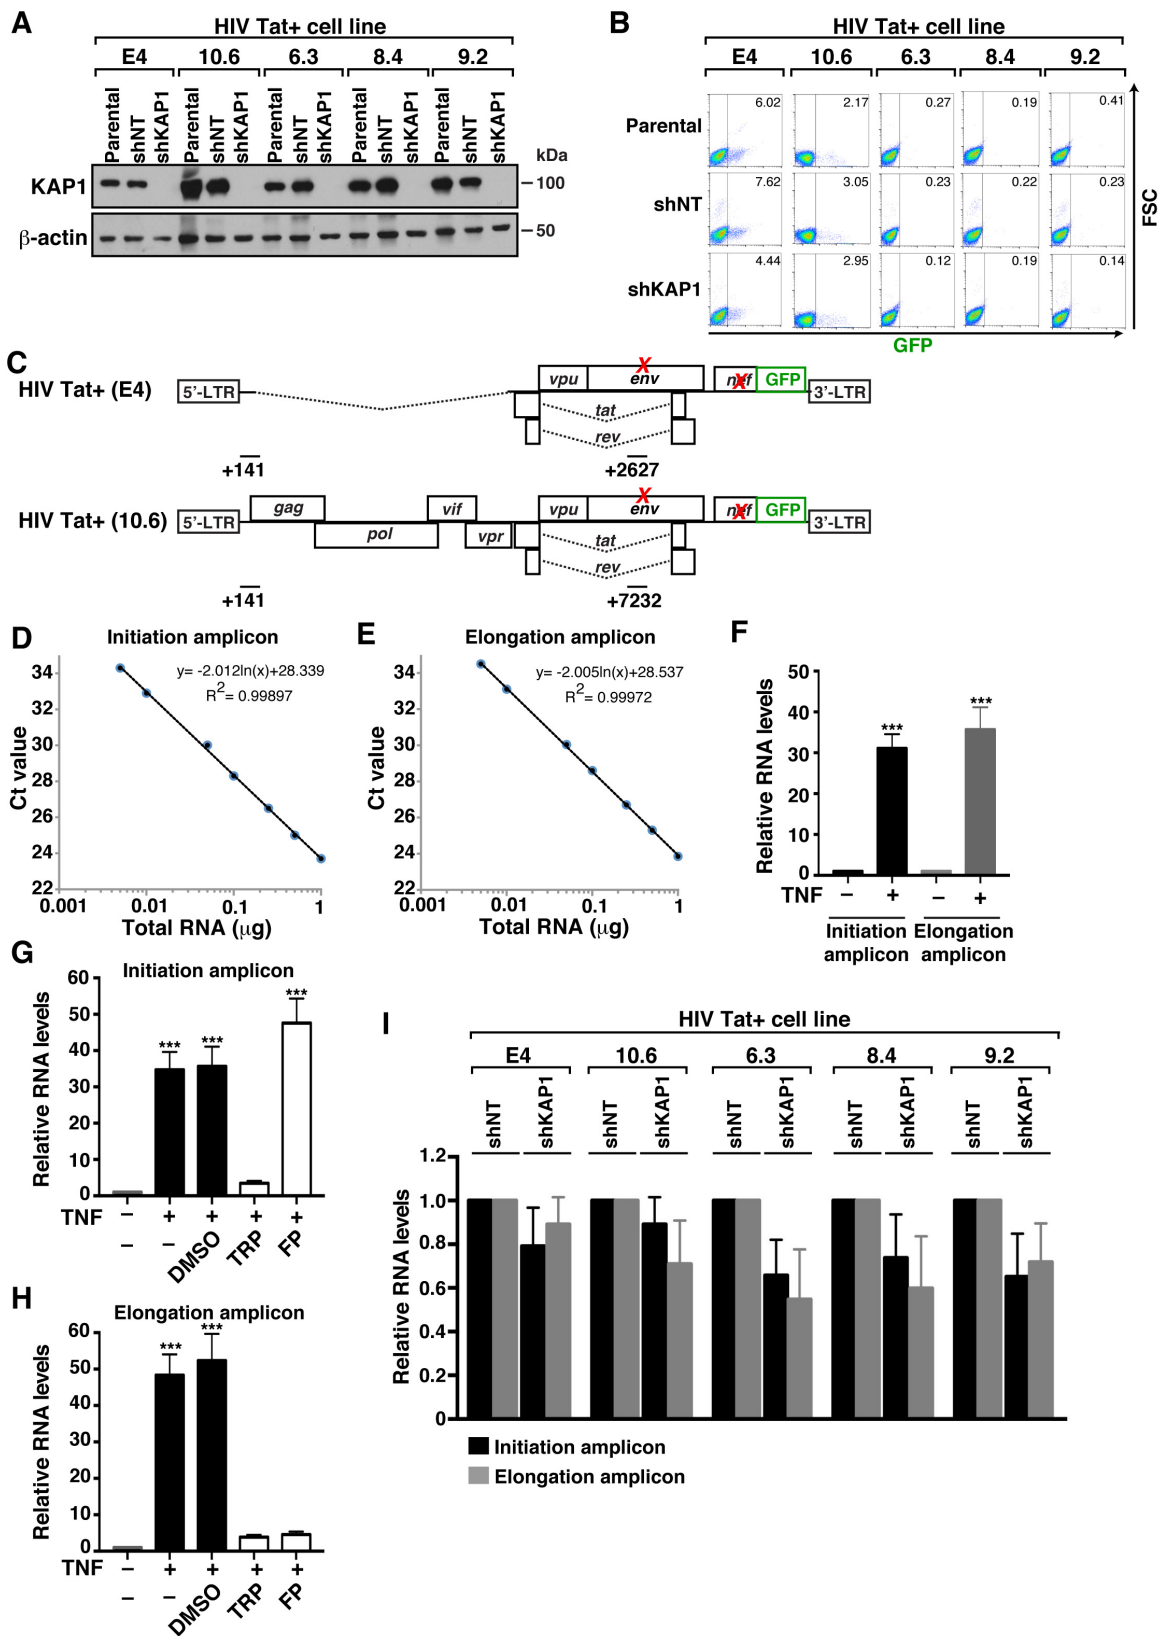

Figure S1. Loss of KAP1 Does not Appear to Affect Basal HIV Transcription. Related to Figure 2

(A) Western blots of the different HIV Tat<sup>+</sup> cell-based models created as described in **Figure 2**.

(B) Flow cytometry analysis of the indicated cell-based models from panel A. FSC, forward scatter. The number in the quadrant denotes the average percentage of GFP<sup>+</sup> cells from three independent experiments.

(C) Scheme of the HIV proviruses with the position of the amplicons used in RT-qPCR assays. The top scheme corresponds to the HIV Tat<sup>+</sup> (E4) provirus, while the bottom scheme corresponds to HIV Tat<sup>+</sup> (10.6, 6.3, 8.4, and 9.2) proviruses. The position of the initiation amplicon (+141) is indicated. The position of the elongation amplicon in the E4 proviral genome is +2627 relative to the TSS, and +7232 in the other proviruses because they contain full-length genomes.

(D-E) Standard curves for RT-qPCR assay. Total RNA from the HIV Tat<sup>+</sup> (E4) clone treated with 25 ng/mL TNF for 16 hr was serially diluted and seven aliquots between 0.005 ng and 1 µg were converted to cDNA using individual RT reactions before performing qPCR assays with the initiation (+141) and elongation (+2627) amplicons. While the initiation amplicon only measures short, promoter-proximal transcripts, the elongation amplicon measures promoter-distal transcripts. PCR amplifications were performed in 20 µL reaction mixtures containing 10 µL of SYBR green master mix, primers and 2 µL of cDNA. The plot demonstrates linear reverse transcription for the concentrations of RNA tested without any effect of RNA input beyond RT capacity. In this situation, both HIV short and long target transcripts (as well as the internal control *ACTB* (data not shown)) have linear RT efficiencies across all starting concentrations of RNA tested. The qPCR plots show threshold Ct values (y-axis) as a function of increasing RNA concentrations (x-axis).

(F) Relative HIV RNA levels of HIV Tat<sup>+</sup> (E4) clone treated (+) or not (-) with 25 ng/mL TNF for 2 hr by RT-qPCR using the initiation and elongation amplicons, and normalized to *ACTB* (mean ± SEM; n = 3).

(G) Quantification of short transcripts with the initiation amplicon (+141) from total RNA from the HIV Tat<sup>+</sup> (E4) clone isolated after treatment with 25 ng/mL TNF alone for 2 hr or pre-treated with Triptolide (TRP), Flavopiridol (FP) or vehicle (DMSO) for 30 min before the addition of TNF. Relative HIV RNA levels were normalized to *ACTB* (mean ± SEM; n = 3).

(H) Quantification of long transcripts with the elongation amplicon (+2627) from total RNA from the HIV Tat<sup>+</sup> (E4) clone isolated after treatment with 25 ng/mL TNF alone for 2 hr or pre-treated with TRP, FP or DMSO for 30 min before the addition of TNF. Relative HIV RNA levels were normalized to *ACTB* (mean ± SEM; n = 3).

(I) Relative HIV RNA levels: initiation (black bars) and elongation (grey bars) transcripts quantified by RT-qPCR and normalized to *ACTB* (mean ± SEM; n = 3).

Statistical significance in all panels was determined using unpaired Student's *t*-test. \**P* < 0.05, \*\**P* < 0.005, \*\*\**P* < 0.0005.

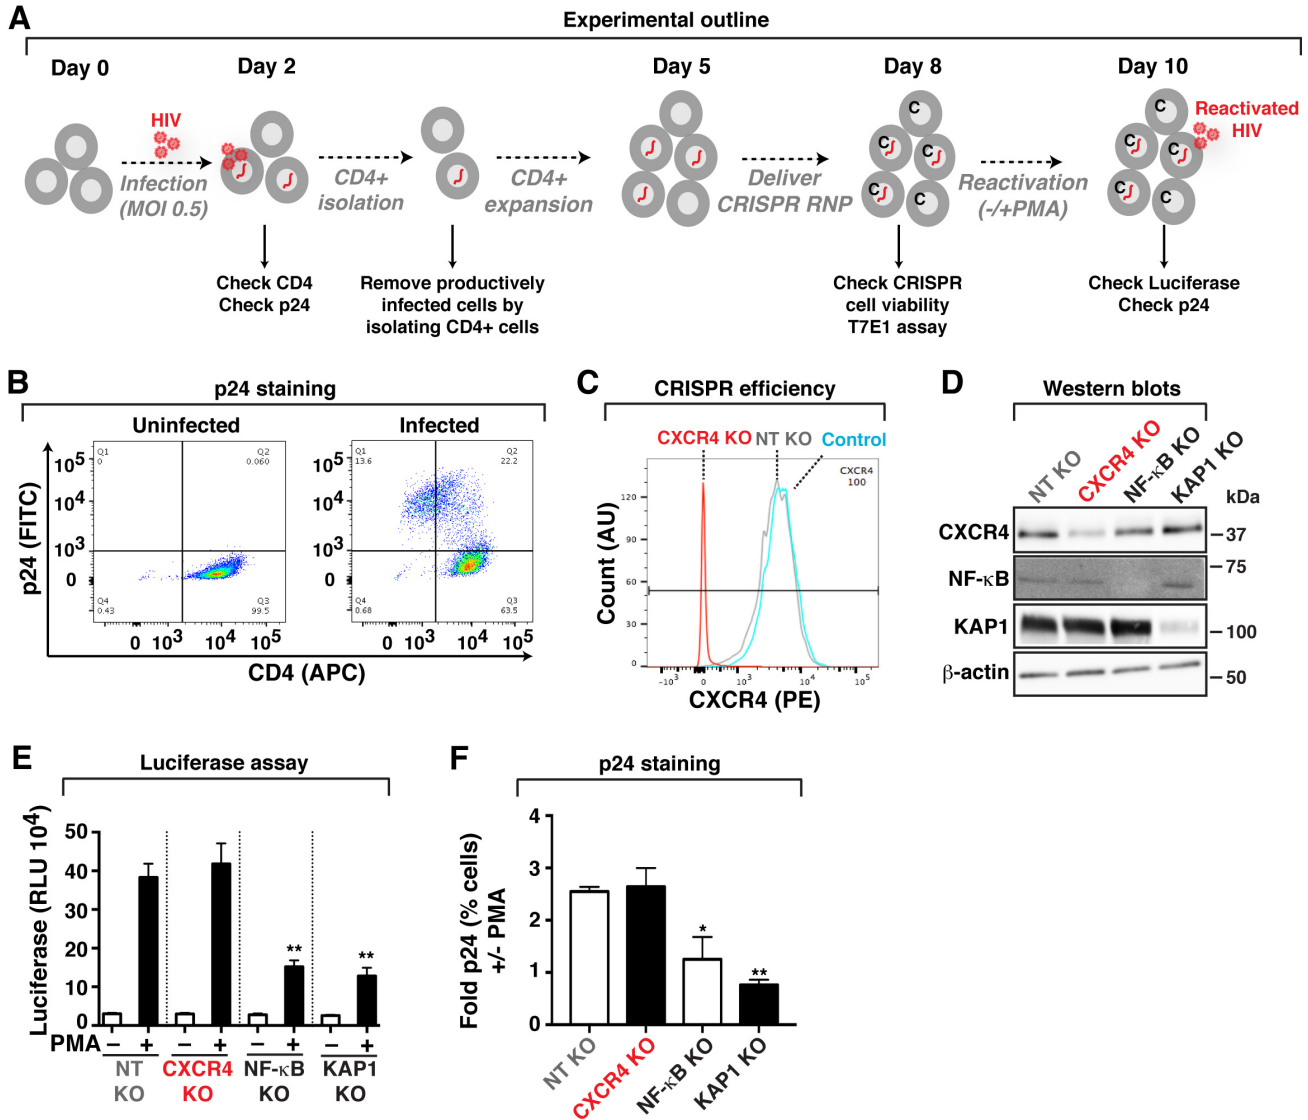

**Figure S2. KAP1 is Required for Latent HIV Reactivation in Response to Immune Signaling in Cell-based Models. Related to Figure 3**

(A) Experimental outline through which CD4<sup>+</sup> SUPT1 cells were used for infections with replication defective, pseudotyped HIV (pNL4-3-delta*Env*-nLuc-2A*Nef*-VSVG), and then used for CRISPR-Cas9-mediated knockout (KO) of CXCR4, NF- $\kappa$ B (p65 subunit) and KAP1, followed by reactivation assays. RNP, Cas9-gRNA RiboNucleoProtein (RNP) complex. C, indicates cells containing the Cas9-gRNA RNP complex.

(B) FACS plots (CD4, HIV p24) of mock infected (uninfected) and HIV-infected cells as in panel (A).

(C) FACS plots (CXCR4) in control SUPT1 cells (not nucleofected) and SUPT1 nucleofected with Cas9-gRNA complexes for targeting CXCR4 and a non-target (NT) negative control. AU, arbitrary units.

(D) Western blots of SUPT1 cells containing KO of specific host cell factors generated as in panel (A) with the indicated antibodies.

(E) Luciferase assay of SUPT1 cells containing KO of specific host cell factors generated as in panel (A) and treated with PMA or vehicle (DMSO). Luciferase is expressed as relative luciferase units (RLU).

(F) p24 staining of SUPT1 cells containing KO of specific host cell factors generated as in panel (A) and treated with PMA or vehicle (DMSO). The fold change in p24 staining (+/- PMA) is indicated.

Statistical significance in panels (E) and (F) was determined using unpaired Student's *t*-test. \* $P < 0.05$ , \*\* $P < 0.005$ , \*\*\* $P < 0.0005$ .

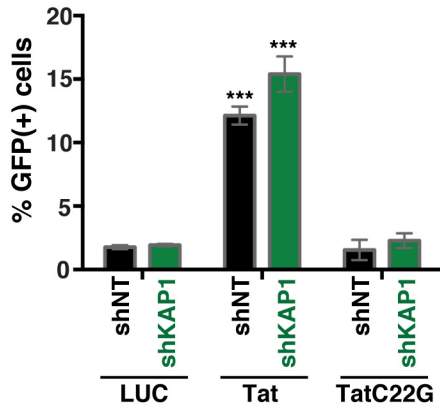

**Figure S3. Tat, but not a non-functional mutant, reactivates a latent HIV Tat- provirus. Related to Figure 5**

Quantification of GFP<sup>+</sup> cells (percentage) in the Jurkat HIV Tat- (2B2D) shNT and shKAP1 cell lines transduced with pTRIP lentiviruses (5 ng p24) expressing firefly luciferase (LUC) as negative control, wild-type Tat or the C22G non-functional mutant. Statistical significance between Tat or TatC22G and LUC samples was determined using unpaired Student's *t*-test. \**P* < 0.05, \*\**P* < 0.005, \*\*\**P* < 0.0005.



(B) HIV RNA levels of the HIV Tat- (2B2D) IPTG-inducible shNT and shKAP1 cell lines from panel (A) untreated (-) or treated with three IPTG concentrations (1, 10, and 100  $\mu$ M; +, ++, +++, respectively) for 2 days in the absence (-) and presence (+) of TNF stimulation for 2 hr and measured by RT-qPCR using the elongation amplicon (+2627) and normalized to *ACTB* (mean  $\pm$  SEM; n = 3).

(C) Fold HIV RNA induction of the HIV Tat- (2B2D) IPTG-inducible shNT and shKAP1 cell lines from panel (A) treated with IPTG (100  $\mu$ M) for 2 days in response to a time course TNF treatment and measured by RT-qPCR using the elongation amplicon (+2627) and normalized to *ACTB* (mean  $\pm$  SEM; n = 3).

(D) Fold HIV RNA induction of HIV Tat- (2B2D) shNT and shKAP1 cell lines in the absence (-) and presence (+) of different amounts of TNF stimulation [TNF<sub>high</sub> (25 ng/mL), TNF<sub>medium</sub> (5 ng/mL), TNF<sub>low</sub> (1 ng/mL)] for 2 hr and measured by RT-qPCR using the elongation amplicon (+2627) and normalized to *ACTB* (mean  $\pm$  SEM; n = 3).

(E) Fold HIV RNA induction of HIV Tat+ (E4) shNT and shKAP1 cell lines in the absence (-) and presence (+) of different amounts of TNF stimulation [TNF<sub>high</sub> (25 ng/mL), TNF<sub>medium</sub> (5 ng/mL), TNF<sub>low</sub> (1 ng/mL)] for 16 hr and measured by RT-qPCR using the elongation amplicon (+2627) and normalized to *ACTB* (mean  $\pm$  SEM; n = 3).

(F) Fold HIV RNA induction of HIV Tat- (2B2D) and HIV Tat+ (E4) shNT and shKAP1 cell lines in the absence (-) and presence (+) of Bryostatin (10 nM) stimulation for 2 hr (HIV Tat-) or 16 hr (HIV Tat+) and measured by RT-qPCR using the elongation amplicon (+2627) and normalized to *ACTB* (mean  $\pm$  SEM; n = 3).

(G) Fold HIV RNA induction of HIV Tat- (2B2D) and HIV Tat+ (E4) shNT and shKAP1 cell lines in the absence (-) and presence (+) of SAHA (500 nM) stimulation for 2 hr (HIV Tat-) or 16 hr (HIV Tat+) and measured by RT-qPCR using the elongation amplicon (+2627) and normalized to *ACTB* (mean  $\pm$  SEM; n = 3).

Statistical significance in all panels was determined using unpaired Student's *t*-test. \**P* < 0.05, \*\**P* < 0.005, \*\*\**P* < 0.0005.



| <b>Cell line</b>                       | <b>Laboratory</b>   | <b>Reference</b>       |
|----------------------------------------|---------------------|------------------------|
| Jurkat E4                              | Jonathan Karn       | (Pearson et al., 2008) |
| Jurkat E4 NT shRNA (shNT)              | Iván D'Orso         | Created in this study  |
| Jurkat E4 KAP1 shRNA (shKAP1)          | Iván D'Orso         | Created in this study  |
| Jurkat E4 NELF-E shRNA (shNELF)        | Iván D'Orso         | Created in this study  |
| Jurkat 10.6                            | Eric Verdin         | (Jordan et al., 2003)  |
| Jurkat 10.6 NT shRNA (shNT)            | Iván D'Orso         | Created in this study  |
| Jurkat 10.6 KAP1 shRNA (shKAP1)        | Iván D'Orso         | Created in this study  |
| Jurkat 10.6 NELF-E shRNA (shNELF)      | Iván D'Orso         | Created in this study  |
| Jurkat 6.3                             | Eric Verdin         | (Jordan et al., 2003)  |
| Jurkat 6.3 NT shRNA (shNT)             | Iván D'Orso         | Created in this study  |
| Jurkat 6.3 KAP1 shRNA (shKAP1)         | Iván D'Orso         | Created in this study  |
| Jurkat 8.4                             | Eric Verdin         | (Jordan et al., 2003)  |
| Jurkat 8.4 NT shRNA (shNT)             | Iván D'Orso         | Created in this study  |
| Jurkat 8.4 KAP1 shRNA (shKAP1)         | Iván D'Orso         | Created in this study  |
| Jurkat 9.2                             | Eric Verdin         | (Jordan et al., 2003)  |
| Jurkat 9.2 NT shRNA (shNT)             | Iván D'Orso         | Created in this study  |
| Jurkat 9.2 KAP1 shRNA (shKAP1)         | Iván D'Orso         | Created in this study  |
| Jurkat 2B2D                            | Jonathan Karn       | (Pearson et al., 2008) |
| Jurkat 2B2D NT shRNA (shNT)            | Iván D'Orso         | Created in this study  |
| Jurkat 2B2D KAP1 shRNA (shKAP1)        | Iván D'Orso         | Created in this study  |
| Jurkat 2B2D (IPTG) NT shRNA (shNT)     | Iván D'Orso         | Created in this study  |
| Jurkat 2B2D (IPTG) KAP1 shRNA (shKAP1) | Iván D'Orso         | Created in this study  |
| U2 OS                                  | ATCC HTB-96         | Purchased              |
| U2 OS NT shRNA (shNT)                  | Iván D'Orso         | Created in this study  |
| U2 OS KAP1 shRNA (shKAP1)              | Iván D'Orso         | Created in this study  |
| HEK 293T/17                            | ATCC CRL-11268      | Purchased              |
| HEK 293FT                              | Thermo Fisher 70007 | Purchased              |
| SUPT1                                  | ATCC CRL-1942       | Purchased              |
| Jurkat E6.1                            | ATCC TIB-152        | Purchased              |

**Table S1. Cell lines used and created in this study. Related to STAR Methods and Figures 2, 3, 4, 5 and 7**

| <b>Target gene</b> | <b>Vector / Restriction sites</b> | <b>Primer numbers / sequences (5'-3') to generate shRNA vectors</b>                                                                                                           |
|--------------------|-----------------------------------|-------------------------------------------------------------------------------------------------------------------------------------------------------------------------------|
| NT                 | pLVTHM/ ClaI-MluI                 | <b>1342</b> /CGCGTCCCCCAACAAGATGAAGAGCACCAATTC AAGAGATTGGTGCTCTTCATCTTGTTGTTTTTGGAAAT<br><b>1343</b> /CGATTTTCAAAAACAACAAGATGAAGAGCACCAATCTCTTGAA TTGGTGCTCTTCATCTTGTTGGGGGA  |
| KAP1               | pLVTHM / ClaI-MluI                | <b>1338</b> /CGCGTCCCCCTGAGACCAAACCTGTGCTTATTCAAGAGATAAGC ACAGGTTTGGTCTCAGTTTTTGGAAAT<br><b>1339</b> /CGATTTCCAAAACCTGAGACCAAACCTGTGCTTATCTCTTGAAT AAGCACAGTTTTGGTCTCAGGGGGA  |
| NELF-E             | pLVTHM / ClaI-MluI                | <b>1340</b> /CGCGTCCCCCTGGATTCCTTGTGCCTCATATTCAAGAGATATGA GGCACAAGGAATCCAGTTTTTGGAAAT<br><b>1341</b> /CGATTTTCAAAAACCTGGATTCCTTGTGCCTCATATCTCTTGAAT ATGAGGCACAAGGAATCCAGGGGGA |
| NT                 | pLKO.1 / AgeI-EcoRI               | SHC002 (Sigma)                                                                                                                                                                |
| KAP1               | pLKO.1 / AgeI-EcoRI               | TRCN0000017998 (Sigma)<br>CCGGCCTGGCTCTGTTCTCTGTCCTCTCGAGAGGACAGAGAACAGAG CCAGGTTTTT                                                                                          |
| NT                 | pLKO.1-IPTG-3xLacO / AgeI-EcoRI   | SHC332 (Sigma)<br>CCGGCAACAAGATGAAGAGCACCAACTCGAGTTGGTGCTCTTCATCT GTTGTTTTTG                                                                                                  |
| KAP1               | pLKO.1-IPTG-3xLacO / AgeI-EcoRI   | TRCN0000017998 (Sigma)<br>CCGGCCTGGCTCTGTTCTCTGTCCTCTCGAGAGGACAGAGAACAGAG CCAGGTTTTT                                                                                          |

**Table S2. shRNA vectors used in this study. Related to STAR Methods and Figures 2, 4, 5 and 7**

| <b>Amplicon*</b>                       | <b>Primer Number / Sequence (5'-3')</b>                                                | <b>Figure (Assay)</b>                                                                                 |
|----------------------------------------|----------------------------------------------------------------------------------------|-------------------------------------------------------------------------------------------------------|
| -353                                   | <b>1093</b> / AAGGCTACTTCCCTGAT<br><b>1094</b> / TAGCACCATCCAAAGGTC                    | 3E, 5F (ChIP)                                                                                         |
| -69                                    | <b>1360</b> / CTTGCTACAAGGGACTT<br><b>1361</b> / AGGGCTCGCCACTCC                       | 3E, 5F (ChIP)                                                                                         |
| -37                                    | <b>1364</b> / CTTTCTACAAGGGACTTTCCGCTG<br><b>1365</b> / CTCCCAGGCTCAGATCTGGTC          | 3E, 5F (ChIP)                                                                                         |
| +141<br>5'-LTR specific                | <b>1111</b> / GCTTAAGCCTCAATAAAGCTTGCCTTGAG<br><b>1112</b> / GTCCTGCGTCGAGAGATCTCCTCTG | 3E, 5F (ChIP)<br>4C, 4E, S1D, S1F, S1G, S1I<br>(RT-qPCR)                                              |
| +2627 (+7232)**                        | <b>1358</b> / TGAGGGACAATTGGAGAAGTGA<br><b>1359</b> / TCTGCACCACTCTTCTCTTGGC           | 3E, 5F (ChIP)<br>3C, 4D, 4F, 5E, 7E, S1E, S1F,<br>S1H, S1I, S4B, S4C, S4D, S4E,<br>S4F, S4G (RT-qPCR) |
| +4230<br>(+9553)***<br>3'-LTR specific | <b>1368</b> / ACAAGAGGAGGAAGAGGTGGGT<br><b>1369</b> / GCCCTGGTGTGTAGTTCTGCCA           | 3E, 5F (ChIP)                                                                                         |
| ACTB                                   | <b>1256</b> / GATGATGATATCGCCGCGCT<br><b>1257</b> / CTTCTCGCGTTGGCCTTGG                | All RT-qPCR experiments                                                                               |

**Table S3. DNA oligonucleotides used in this study. Related to STAR Methods and Figures 3, 4, 5 and 7**

\*The number of the amplicons used in real-time PCR quantification of the ChIP-enriched DNA represents the midpoint of the two primers respective to the transcription start site (TSS), upstream the TSS (-) and downstream the TSS (+).

\*\*Note that +2627 and +7232 are the same amplicon. +2627 is the position of the amplicon respective to the TSS in the HIV Tat+ (E4) and HIV Tat- (2B2D) cell-based models and +7232 is the position of the amplicon respective to the TSS in the HIV Tat+ (10.6, 6.3, 8.4, and 9.2) cell-based models and in infection experiments with HIV-1<sub>NL4-3</sub>.

\*\*\*Note that the +4230 and +9553 are the same amplicon. +4230 is the position of the amplicon respective to the TSS in the HIV Tat+ (E4) and HIV Tat- (2B2D) cell-based models and +9553 is the position of the amplicon respective to the TSS in the HIV Tat+ (10.6, 6.3, 8.4, and 9.2) cell-based models and in infection experiments with HIV-1<sub>NL4-3</sub>.

| Target                     | Company         | Catalogue Number | Assay (Dilution used)                                             |
|----------------------------|-----------------|------------------|-------------------------------------------------------------------|
| β-actin (C4)               | Santa Cruz      | sc-47778         | Western blot (1:5000)                                             |
| NELF-E (H-140)             | Santa Cruz      | sc-32912         | Western blot (1:2000)                                             |
| KAP1 (20C1)                | Abcam           | ab22553          | Western blot (1:5000)<br>ChIP (5 μg / 20 million cells)           |
| RNA polymerase II (N-20)   | Santa Cruz      | sc-899X          | ChIP (5 μg / 20 million cells)                                    |
| Cdk9 (C-20)                | Santa Cruz      | sc-484           | ChIP (5 μg / 20 million cells)                                    |
| NF-κB p65 (C-20)           | Santa Cruz      | sc-372           | Western blot (1:5000)                                             |
| CXCR4 (PE conjugated)      | BD Biosciences  | 555974           | Flow cytometry (1:500)                                            |
| CD4 (APC conjugated)       | Thermo Fisher   | MHCD0405         | Flow cytometry (1:1000)                                           |
| p24 (FITC conjugated)      | Beckman Coulter | 6604665          | Flow cytometry (1:500)                                            |
| IL4                        | PeproTech       | 500-P24          | Primary CD4 T cell Polarization<br>(2 μg/ 2 mL/ 10 million cells) |
| IL12                       | PeproTech       | 500-P154         | Primary CD4 T cell Polarization (2 μg/<br>2 mL/ 10 million cells) |
| Normal Mouse IgG           | Santa Cruz      | sc-2025          | ChIP (5 μg/ 20 million cells)                                     |
| Donkey anti-rabbit IgG-HRP | Santa Cruz      | sc-2313          | Western blot (1:10.000)                                           |
| Goat anti-mouse IgG-HRP    | Santa Cruz      | sc-2005          | Western blot (1:10.000)                                           |

**Table S4. Antibodies used in this study. Related to STAR Methods and Figures 2, 3, 4, 5 and 7**

| <b>Insert</b>            | <b>Vector / tag</b> | <b>Restriction sites / Reference</b> |
|--------------------------|---------------------|--------------------------------------|
| FFL LUC                  | pTRIP               | SpeI-XhoI / (Schoggins et al., 2011) |
| Tat                      | pTRIP / STREP       | SpeI-XhoI / This study               |
| Tat C22G                 | pTRIP / STREP       | SpeI-XhoI / This study               |
| KAP1 shRNA               | pLVTHM              | ClaI-MluI / This study               |
| NELF-E shRNA             | pLVTHM              | ClaI-MluI / This study               |
| Non Target (NT) shRNA    | pLVTHM              | ClaI-MluI / This study               |
| KAP1 shRNA               | pLKO.1              | AgeI-EcoRI / This study              |
| Non Target (NT) shRNA    | pLKO.1              | AgeI-EcoRI / This study              |
| KAP1 shRNA               | pLKO.1-IPTG-3xLacO  | Proprietary Sigma                    |
| Non Target (NT) shRNA    | pLKO.1-IPTG-3xLacO  | Proprietary Sigma                    |
| GAL4                     | pcDNA4TO            | HindIII-EcoRI / This study           |
| GAL4-CycT1               | pcDNA4TO            | EcoRI-XhoI / This study              |
| GAL4-CDK9                | pcDNA4TO            | EcoRI-XhoI / This study              |
| GAL4-CDK9 T186A          | pcDNA4TO            | EcoRI-XhoI / This study              |
| HIV LTR – FFL – LUC      | pcDNA3.1+           | (D'Orso et al., 2012)                |
| HIV LTR 5xGal4 – FFL LUC | pcDNA3.1+           | (D'Orso et al., 2012)                |
| CMV – RL LUC             | pCMV                | (D'Orso et al., 2012)                |

**Table S5. Plasmids used in this study. Related to STAR Methods and Figures 2, 3, 4, 5 and 7**

| Equation                                  | Measured parameters | Dimension                              | Reference                 | Model Reference | Tat+ KAP1+ | Tat- KAP1+ | Tat+ KAP1- | Tat- KAP1- |
|-------------------------------------------|---------------------|----------------------------------------|---------------------------|-----------------|------------|------------|------------|------------|
| <b><u>dRNA/dt</u></b>                     |                     |                                        |                           |                 |            |            |            |            |
| $\tau_{\text{RNA}}$                       |                     |                                        |                           |                 | 0.2071     | 0.2071     | 0.2071     | 0.2071     |
| $\mu_{\text{RNA}}$                        | 0.05                | Transcript/sec                         | (Tay et al., 2010)        | 3               | 3.093      | 3.093      | 3.093      | 3.093      |
| $k_{\text{Mm}}$                           | 1E+5                | Average number NF- $\kappa$ B per cell | (Tay et al., 2010)        |                 | 120        | 120        | 120        | 120        |
| $k_{\text{synth}}(\text{h})$              | n.d.                |                                        |                           |                 | 8.2E-6     | 8.2E-6     | 8.2E-6     | 8.2E-6     |
| $k_{\text{synth}}(\text{v})$              | 0.1                 | Transcript/sec                         | (Weinberger et al., 2005) | 6               | 3.93E-4    | 3.93E-4    | 3.93E-4    | 3.93E-4    |
| $k_{\text{decay}}$                        | 0.2                 | 1/hr                                   | (Reddy and Yin, 1999)     | 0.003           | 0.0132     | 0.0132     | 0.0132     | 0.0132     |
| <b><u>dTat/dt</u></b>                     |                     |                                        |                           |                 |            |            |            |            |
| $k_{\text{trans}}$                        | 0.005 – 0.5         | Protein/sec                            | (Weinberger et al., 2005) | 0.3 – 30        | 0.5412*    | 0          | 0.5412*    | 0          |
| $\mu_{\text{Tat}}$                        | 25 – 100            | -                                      | (Reddy and Yin, 1999)     | 60              | 35.4256    | 35.4256    | 35.4256    | 35.4256    |
| $k_{\text{MTat}}$                         | n.d.                |                                        |                           |                 | 125        | 125        | 125        | 125        |
| $d_{\text{Tat}}$                          | 0.154               | Protein/hr                             | (Reddy and Yin, 1999)     | 0.025           | 0.0194     | 0.0194     | 0.0194     | 0.0194     |
| <b><u>dNF-<math>\kappa</math>B/dt</u></b> |                     |                                        |                           |                 |            |            |            |            |
| $\beta$                                   | 2E-5 – 0.01         | 1/sec                                  | (Tay et al., 2010)        | 0.0012 – 0.6    | 0.5        | 0.5        | 0.5        | 0.5        |
| $d_{\text{NF-}\kappa\text{B}}$            | 0.05                | 1/sec                                  | (Tay et al., 2010)        | 3               | 3          | 3          | 3          | 3          |
| <b><u>dKAP1/dt</u></b>                    |                     |                                        |                           |                 |            |            |            |            |
| $d_{\text{KAP1}}$                         | n.d.                |                                        |                           |                 | 0.006      | 0.006      | 0.006      | 0.006      |
| $\rho$                                    | n.d.                |                                        |                           |                 | 0.081*     | 0.081*     | 0.001      | 0.001      |
| <b><u>dTNF/dt</u></b>                     |                     |                                        |                           |                 |            |            |            |            |
| $d_{\text{TNF}}$                          | 0.0002              | 1/sec                                  | (Tay et al., 2010)        | 0.012           | 0.012      | 0.012      | 0.012      | 0.012      |
| <b><u>dRNAbasal/dt</u></b>                |                     |                                        |                           |                 |            |            |            |            |
| $\alpha$                                  | 1E-8                | Transcript/sec                         | (Weinberger et al., 2005) | 6E-7            | 0.008      | 0.008      | 0.008      | 0.008      |
| $d_{\text{RNAbasal}}$                     | 0.0122              | Nucleotides/sec                        | (Reddy and Yin, 1999)     | 0.00244         | 0.00667    | 0.00667    | 0.00667    | 0.00667    |

**Table S6. SDE Parameters Used in the Mathematical Modeling. Related to STAR Methods and Figure 6**

Note: The asterisk (\*) indicates the only two parameters that change in the four different scenarios. N.d. denotes not determined.

$$\begin{aligned} \frac{d[RNA]}{dt} = & \mu_{RNA} \frac{[NF\kappa B]}{k_{Mm} + [NF\kappa B]} + \tau_{RNA}[KAP1][NF\kappa B] + k_{synth(h)}[KAP1][Tat] \\ & + k_{synth(v)}[Tat] - k_{decay}[RNA] \end{aligned} \quad (1)$$

$$\frac{d[Tat]}{dt} = k_{trans}[RNA] + \mu_{Tat} \frac{[Tat]}{k_{MTat} + [Tat]} - d_{Tat}[Tat] \quad (2)$$

$$\frac{d[NF\kappa B]}{dt} = \beta[TNF] - d_{NF\kappa B}[NF\kappa B] \quad (3)$$

$$\frac{d[KAP1]}{dt} = \rho - d_{KAP1}[KAP1] \quad (4)$$

$$\frac{d[TNF]}{dt} = -d_{TNF}[TNF] \quad (5)$$

$$\frac{d[RNAbasal]}{dt} = \alpha - d_{RNAbasal}[RNAbasal] \quad (6)$$

$$[RNAtot] = [RNA] + [RNAbasal] \quad (7)$$

**Table S7. System of ODEs Describing the Deterministic Approximation of the Mathematical Model. Related to STAR Methods and Figure 7**
